CORRECTION

# Correction: Cognitive Improvement during Treatment for Mild Alzheimer's Disease with a Chinese Herbal Formula: A Randomized Controlled Trial

Yulian Zhang, Cuiru Lin, Linlin Zhang, Yuanwu Cui, Yun Gu, Jiakui Guo, Di Wu, Qiang Li, Wanshan Song

The affiliation for the third author is incorrect. Linlin Zhang is not affiliated with #2 but with #1 Department of Acupuncture and Cerebroproathy, Second Affiliated Hospital of Tianjin University of Traditional Chinese Medicine, Tianjin, China.

## Reference

1. Zhang Y, Lin C, Zhang L, Cui Y, Gu Y, Guo J, et al. (2015) Cognitive Improvement during Treatment for Mild Alzheimer's Disease with a Chinese Herbal Formula: A Randomized Controlled Trial. PLoS ONE 10(6): e0130353. <https://doi.org/10.1371/journal.pone.0130353> PMID: 26076022

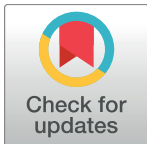

## OPEN ACCESS

**Citation:** Zhang Y, Lin C, Zhang L, Cui Y, Gu Y, Guo J, et al. (2018) Correction: Cognitive Improvement during Treatment for Mild Alzheimer's Disease with a Chinese Herbal Formula: A Randomized Controlled Trial. PLoS ONE 13(6): e0199895. <https://doi.org/10.1371/journal.pone.0199895>

**Published:** June 25, 2018

**Copyright:** © 2018 Zhang et al. This is an open access article distributed under the terms of the [Creative Commons Attribution License](https://creativecommons.org/licenses/by/4.0/), which permits unrestricted use, distribution, and reproduction in any medium, provided the original author and source are credited.
